# Supplementary material for: 緑肥作物施用草地における土壌性ダニ類について(第 8 回日本ダニ学会大会講演要旨)
Source: Royal Society of Chemistry journal article supplement (doi:10.1039/c8cc09367a), 2000-05-25
Supplement: c8cc09367a1.pdf [file c8cc09367a1.pdf]

## Electronic Supplementary Information:

### **Seleno twisted benzodiperylenediimides: a facile synthesis and excellent electron acceptors for additive-free organic solar cells**

Ming Hu<sup>a,†</sup>, Xiaohong Zhao<sup>a,†</sup>, Guomin Zhu<sup>a</sup>, Youdi Zhang<sup>a,b</sup>, Zhongyi Yuan<sup>\*a,b</sup>, Lei Wang<sup>a</sup>, Xiaoshuai Huang<sup>a</sup>, Yu Hu<sup>a</sup>, and Yiwang Chen<sup>\*a,b</sup>

<sup>a</sup>College of Chemistry, Nanchang University, 999 Xuefu Avenue, Nanchang 330031, China

<sup>b</sup>Institute of Polymers and Energy Chemistry (IPEC), Nanchang University, 999 Xuefu Avenue, Nanchang 330031, China

\*Corresponding author.

E-mail: yuan@ncu.edu.cn (Z. Yuan)

Tel.: +86 791 83968703; Fax: +86 791 83969561.

E-mail: ywchen@ncu.edu.cn (Y. Chen)

<sup>†</sup>Author contributions. M. Hu and X. Zhao contributed equally to this work.

## Content

|                                                                                              |    |
|----------------------------------------------------------------------------------------------|----|
| Experimental Details.....                                                                    | 3  |
| S1. Materials and methods .....                                                              | 3  |
| S2. Synthetic Procedures.....                                                                | 3  |
| S3. NMR spectra .....                                                                        | 5  |
| S3.1. <sup>1</sup> H NMR of 3 in CDCl <sub>3</sub> (400 MHz).....                            | 5  |
| S3.2. <sup>13</sup> C NMR of 3 in CDCl <sub>3</sub> (100 MHz) .....                          | 5  |
| S3.3. <sup>1</sup> H NMR of 4 in CDCl <sub>3</sub> (400 MHz).....                            | 6  |
| S3.4. <sup>13</sup> C NMR of 4 in CDCl <sub>3</sub> (100 MHz) .....                          | 6  |
| S3.5. <sup>1</sup> H NMR of 5 in CDCl <sub>3</sub> (400 MHz).....                            | 7  |
| S3.6. <sup>13</sup> C NMR of 5 in CDCl <sub>3</sub> (100 MHz) .....                          | 7  |
| S3.7. <sup>1</sup> H NMR of 6 in CDCl <sub>3</sub> (400 MHz).....                            | 8  |
| S3.8. <sup>13</sup> C NMR of 6 in CDCl <sub>3</sub> (400 MHz) .....                          | 8  |
| S3.9. <sup>1</sup> H NMR of TBDPDI-Se-C <sub>11</sub> in CDCl <sub>3</sub> (400 MHz) .....   | 9  |
| S3.10. <sup>13</sup> C NMR of TBDPDI-Se-C <sub>11</sub> in CDCl <sub>3</sub> (100 MHz) ..... | 9  |
| S3.11. <sup>1</sup> H NMR of TBDPDI-Se-C <sub>23</sub> in CDCl <sub>3</sub> (400 MHz) .....  | 10 |
| S3.12. <sup>13</sup> C NMR of TBDPDI-Se-C <sub>23</sub> in CDCl <sub>3</sub> (100 MHz) ..... | 10 |
| S4. TGA curves of TBDPDI-Se-C <sub>11</sub> and TBDPDI-Se-C <sub>23</sub> .....              | 11 |
| S5. DSC curves of TBDPDI-Se-C <sub>11</sub> and TBDPDI-Se-C <sub>23</sub> . ....             | 11 |
| S6. UV-visible absorption. ....                                                              | 11 |
| S7. DFT calculations.....                                                                    | 12 |
| S8. Cyclic voltammetry.....                                                                  | 13 |
| S9. Optimization of the fabricating conditions of solar cells .....                          | 13 |
| S10. <i>J-V</i> Curves for carrier mobility .....                                            | 15 |
| S11. Charge separation and recombination dynamics.....                                       | 16 |
| S12. AFM images of the blend films .....                                                     | 17 |
| S13. TEM images of the blend films.....                                                      | 18 |
| Reference .....                                                                              | 18 |

## Experimental Details

### S1. Materials and methods

Chlorobenzene, Ag (99.999%), MoO<sub>3</sub> (99.999%), indium-tin oxide (ITO) glass, and other materials were purchased from commercial suppliers. PBDB-T was synthesized with the reported method.<sup>1</sup>

The <sup>1</sup>H and <sup>13</sup>C NMR were measured on NMR Spectrometer with tetramethylsilane (TMS) as the internal standard. Mass spectra were recorded with a MALDI-TOF mass spectrometer in linear mode. UV-vis absorption was recorded on a Perkin Elmer Lambda 750 spectrophotometer. All the measurements were carried out at room temperature.

### S2. Synthetic Procedures

**Synthesis of 3.** A mixture of **2** (4.02 g, 5.76 mmol), selenium power (4.55 g, 57.63 mmol), and 40 mL *N*-methyl pyrrolidone (NMP) was stirred at 170 °C for 8 h under argon. The mixture was extracted with CH<sub>2</sub>Cl<sub>2</sub>, washed with water, and purified through the silica gel column. The eluent was petroleum ether/CH<sub>2</sub>Cl<sub>2</sub> (1:1, v/v). Compound **3** (3.24 g, 77%) was obtained as a yellow solid. <sup>1</sup>H NMR (400 MHz, CDCl<sub>3</sub>) δ 8.44 (s, 2H), 8.36 (d, 2H), 8.14 (d, 2H), 4.43 (m, 8H), 1.86 (s, 8H), 1.55 (d, 8H), 1.04 ppm (d, 12H). <sup>13</sup>C NMR (100 MHz, CDCl<sub>3</sub>) δ 168.6, 137.4, 132.1, 129.2, 125.6, 121.4, 65.5, 30.7, 19.3, 13.8 ppm. HRMS (MALDI-TOF): Calcd for C<sub>32</sub>H<sub>49</sub>N<sub>3</sub>O<sub>2</sub>: 730.2045, found: 730.2059 (M<sup>+</sup>). MP: 225 °C.

**Synthesis of 4.** A mixture of **3** (3.01 g, 4.12 mmol), Br<sub>2</sub> (65.92g, 412.48 mmol), and 50 mL CH<sub>2</sub>Cl<sub>2</sub> was stirred at 0 °C for 15 min. The mixture was extracted with CH<sub>2</sub>Cl<sub>2</sub>, washed with water, and purified through the silica gel column. The eluent is petroleum ether/CH<sub>2</sub>Cl<sub>2</sub> (2:1, v/v). Compound **4** (2.47 g, 74%) was obtained as a yellow solid. <sup>1</sup>H NMR (400 MHz, CDCl<sub>3</sub>) δ 9.91 (d, 1H), 8.61 (d, 2H), 8.53 (s, 1H), 8.25 (d, 1H), 4.43 (d, 8H), 1.87 (m, 8H), 1.55 (m, 8H), 1.03 ppm (m, 12H). <sup>13</sup>C NMR (100 MHz, CDCl<sub>3</sub>) δ 168.3, 167.2, 138.0, 137.2, 136.9, 130.3, 129.9, 128.5, 126.42, 125.1, 118.8, 65.7, 30.6, 19.3, 13.8 ppm. HRMS (MALDI-TOF): Calcd for C<sub>32</sub>H<sub>49</sub>N<sub>3</sub>O<sub>2</sub>: 808.1150, found: 808.1167 (M<sup>+</sup>). MP: 115 °C.

**Synthesis of 5.** A mixture of **4** (0.53 g, 0.65 mmol), 1,4-benzenediboronic acid bis(pinacol) ester (0.098 g, 0.30 mmol), Pd(PPh<sub>3</sub>)<sub>4</sub> (0.028 g, 0.024 mmol), K<sub>2</sub>CO<sub>3</sub> (0.49 g, 3.56 mmol), 4 mL THF, and 2 mL H<sub>2</sub>O was stirred at 85 °C for 13 h under argon. The mixture was extracted with CH<sub>2</sub>Cl<sub>2</sub>, washed with water, and purified through the silica gel column. The eluent is CH<sub>2</sub>Cl<sub>2</sub>. Compound **5** (0.26 g, 75%) was obtained as a yellow solid. <sup>1</sup>H NMR (400 MHz, CDCl<sub>3</sub>) δ 8.78 (d, 4H), 8.48 (s, 2H), 8.13 (s, 2H), 7.96 (s, 2H), 7.81 (s, 4H), 4.41 (d, 16H), 1.81 (d, 16H), 1.50 (m, 16H), 1.01 ppm (d, 24H). <sup>13</sup>C NMR (100 MHz, CDCl<sub>3</sub>) δ 168.58, 143.12, 138.72, 138.69, 137.82, 137.13, 133.89, 130.48, 129.06, 128.70, 127.94, 125.79, 125.30, 65.67, 30.56, 29.60, 19.30, 13.73 ppm. HRMS (MALDI-TOF): Calcd for C<sub>32</sub>H<sub>49</sub>N<sub>3</sub>O<sub>2</sub>: 1534.4246, found: 1534.4260 (M<sup>+</sup>). MP: 150 °C.

**Synthesis of 6.** A mixture of **5** (0.20 g, 0.13 mmol), I<sub>2</sub> (0.01 g, 0.039 mmol), and 800 mL CH<sub>2</sub>Cl<sub>2</sub> was exposed to sunlight for 8 h. The mixture was extracted with CH<sub>2</sub>Cl<sub>2</sub>, washed with water, and recrystallized from toluene and acetic acid. Compound **6** (0.16 g, 80%) was obtained as a yellow solid. <sup>1</sup>H NMR (400 MHz, CDCl<sub>3</sub>) δ 10.06 (s, 2H), 9.70 (s, 2H), 9.49 (s, 3H), 9.31 (d, 2H), 4.62 (m, 12H), 4.03 (m, 4H), 1.95 (m, 7H), 1.25 (m, 24H), 1.03 (m, 11H), 0.84 ppm (m, 14H). <sup>13</sup>C NMR (100 MHz, CDCl<sub>3</sub>) δ 168.53, 167.94, 138.55, 133.61, 133.35, 129.61, 128.03, 127.21, 126.01, 125.32, 125.03, 123.39, 65.85, 30.52, 29.72, 19.39, 19.35, 18.65, 13.97, 12.95, 1.02 ppm. HRMS (MALDI-TOF): Calcd for C<sub>32</sub>H<sub>49</sub>N<sub>3</sub>O<sub>2</sub>: 1530.3933, found: 1530.4110 (M<sup>+</sup>). MP: > 300 °C.

**Synthesis of TBPDA-Se. 6** (0.50 g, 0.33 mmol) was dropwisely added to 15 mL ClSO<sub>3</sub>H at 0 °C. After stirring at room temperature for 4 h, the mixture was poured into the ice, filtered, washed with water and ethanol. TBPDA-Se (0.33 g, 100%) was obtained as a red solid. It was used directly in the next step without further purification because of poor solubility. MP: > 300 °C.

**Synthesis of TBPDI-Se-C<sub>11</sub>.** A mixture of TBPDA-Se (0.50 g, 0.50 mmol), 1-pentylhexylamine (0.51 g, 2.97 mmol), and imidazole (50 g) was stirred at 150 °C for 4 h under argon. The mixture was extracted with CHCl<sub>3</sub>, washed with water, and purified through silica gel column chromatography. The eluent is petroleum ether/CH<sub>2</sub>Cl<sub>2</sub> (1:1, v/v). TBPDI-Se-C<sub>11</sub> (0.33 g, 41%) was obtained as the orange solid. <sup>1</sup>H NMR (400 MHz, CDCl<sub>3</sub>) δ 10.61 (d, 2H), 10.29 (s, 2H), 9.85 (d, 6H), 5.50 (s, 3H), 5.04 (s, 1H), 2.26–0.88 (m, 92H). <sup>13</sup>C NMR (100 MHz, CDCl<sub>3</sub>) δ 141.31, 134.25, 130.76, 129.10, 127.68, 127.28, 124.93, 124.49, 124.15, 123.82, 122.61, 122.09, 77.30, 76.98, 76.66, 55.34, 32.59, 31.88, 31.39, 29.59, 26.81, 23.78, 22.58, 19.63, 14.07, 13.53 ppm. HRMS (MALDI-TOF): Calcd for C<sub>32</sub>H<sub>49</sub>N<sub>3</sub>O<sub>2</sub>: 1622.6028, found: 1622.6022 (M<sup>+</sup>). MP: > 300 °C.

**Synthesis of TBPDI-Se-C<sub>23</sub>.** A mixture of TBPDI-Se (0.50 g, 0.50 mmol), 1-undecyldodecyl amine (1.01 g, 2.97 mmol), and imidazole (50 g) was stirred at 150 °C for 4 h under argon. The mixture was extracted with CHCl<sub>3</sub>, washed with water, and purified through silica gel column chromatography. The eluent is petroleum ether/CH<sub>2</sub>Cl<sub>2</sub> (1:1, v/v). TBPDI-Se-C<sub>23</sub> (0.47 mg, 41%) was obtained as the orange solid. <sup>1</sup>H NMR (400 MHz, CDCl<sub>3</sub>) δ 10.56 (s, 2H), 10.34 (s, 2H), 9.87 (s, 6H), 5.47 (m, 4H), 2.38–0.88 ppm (m, 188H). <sup>13</sup>C NMR (100 MHz, CDCl<sub>3</sub>) δ 165.5, 164.5, 141.4, 133.9, 130.7, 128.9, 127.4, 125.0, 124.4, 124.2, 123.5, 122.5, 121.9, 42.8, 31.9, 29.6, 27.1, 23.3, 14.1 ppm. HRMS (MALDI-TOF): Calcd for C<sub>32</sub>H<sub>49</sub>N<sub>3</sub>O<sub>2</sub>: 2295.3540, found: 2295.3580 (M<sup>+</sup>). MP: > 300 °C.

### S3. NMR spectra

#### S3.1. $^1\text{H}$ NMR of **3** in $\text{CDCl}_3$ (400 MHz)

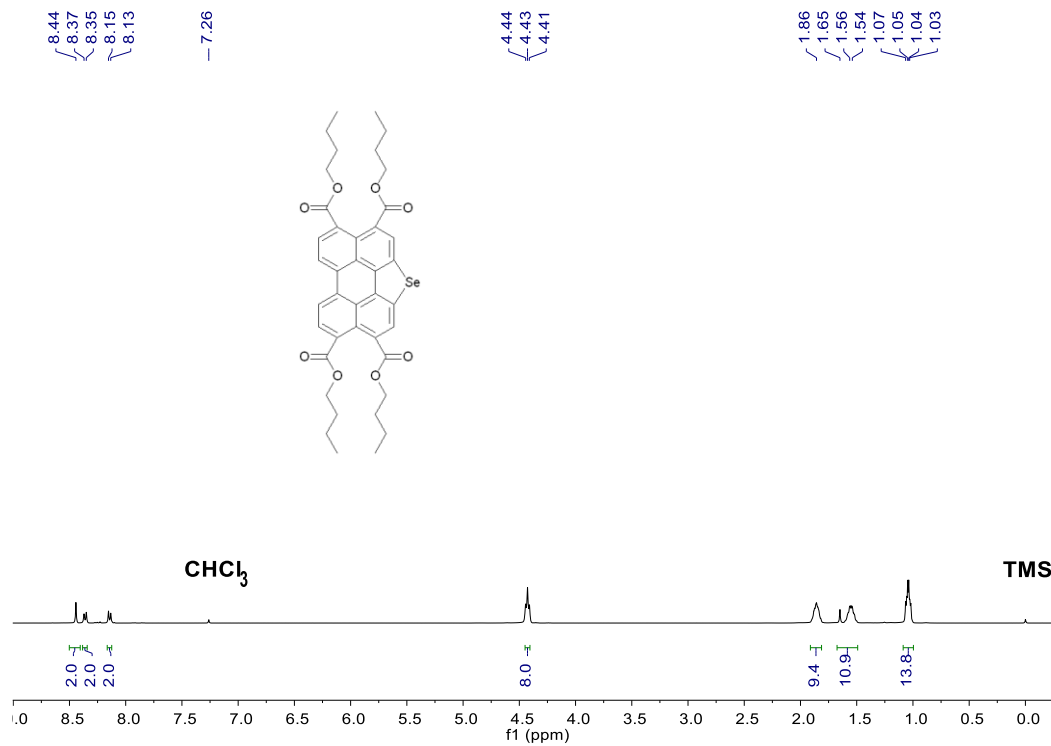

#### S3.2. $^{13}\text{C}$ NMR of **3** in $\text{CDCl}_3$ (100 MHz)

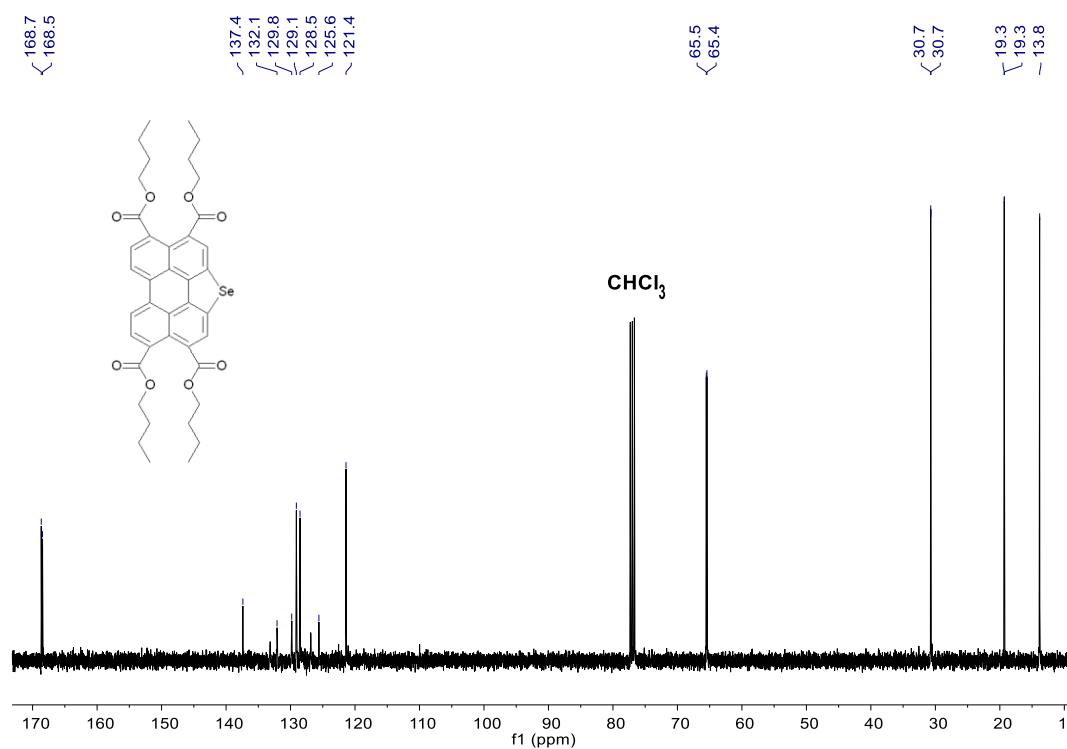

**S3.3.**  $^1\text{H}$  NMR of **4** in  $\text{CDCl}_3$  (400 MHz)

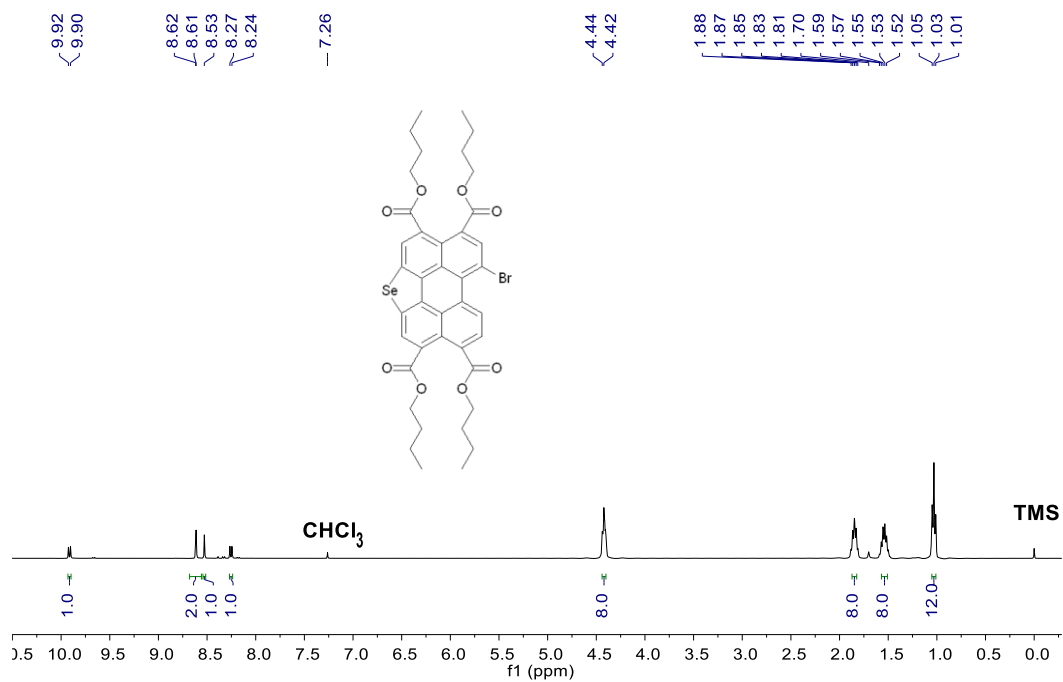

**S3.4.**  $^{13}\text{C}$  NMR of **4** in  $\text{CDCl}_3$  (100 MHz)

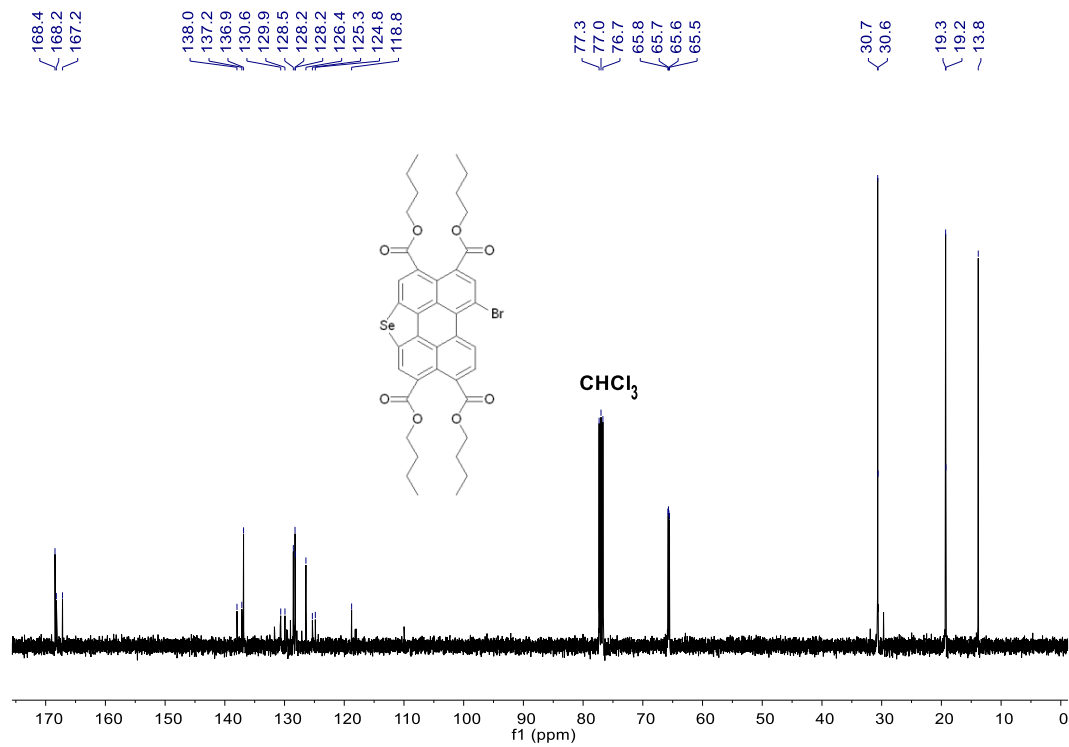

**S3.5.**  $^1\text{H}$  NMR of **5** in  $\text{CDCl}_3$  (400 MHz)

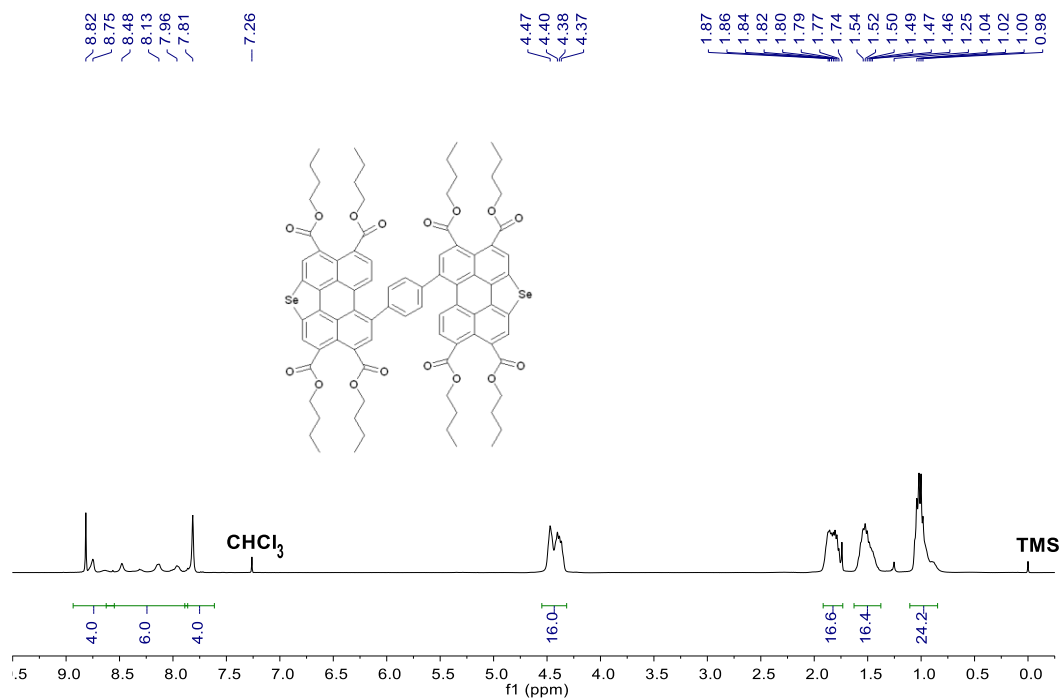

**S3.6.**  $^{13}\text{C}$  NMR of **5** in  $\text{CDCl}_3$  (100 MHz)

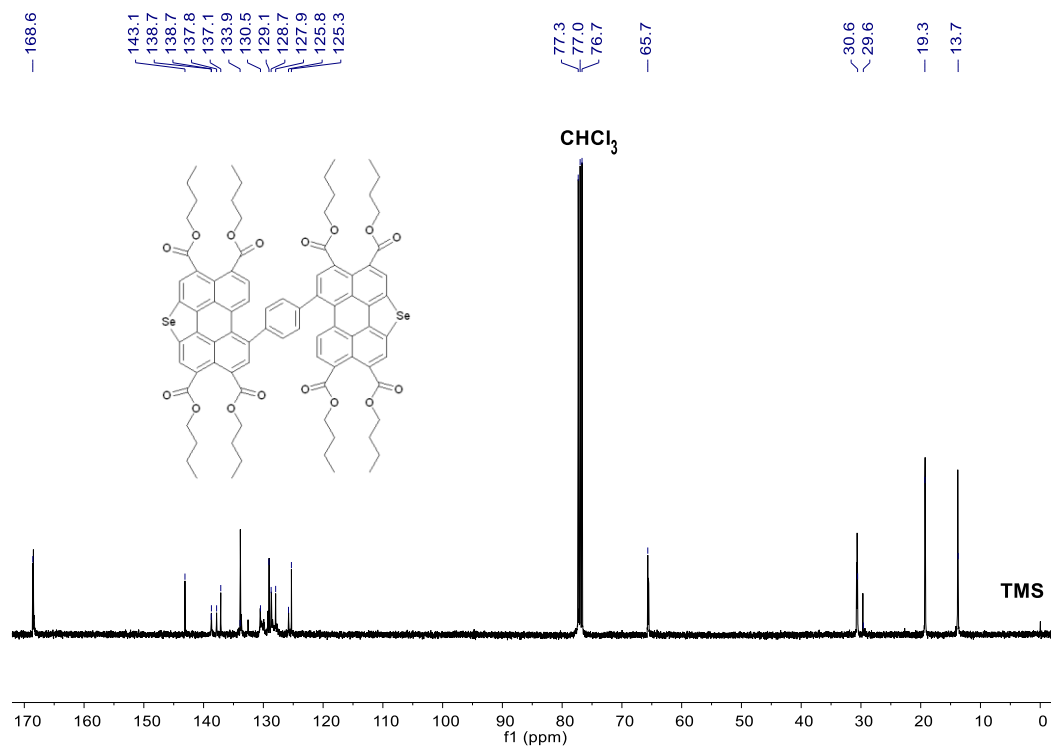

**S3.7.**  $^1\text{H}$  NMR of **6** in  $\text{CDCl}_3$  (400 MHz)

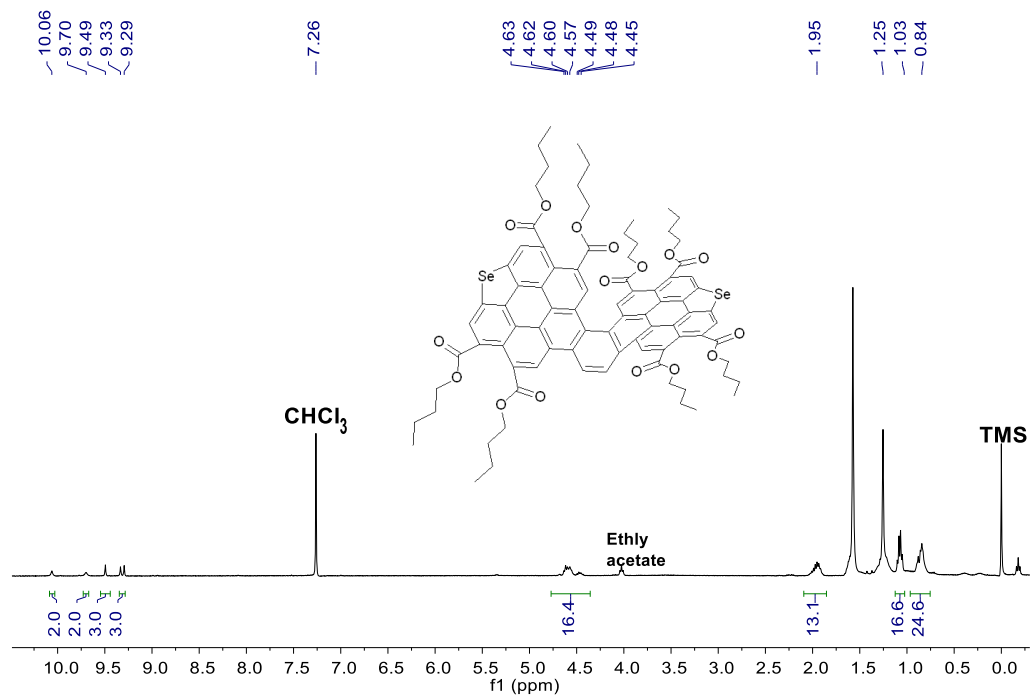

**S3.8.**  $^{13}\text{C}$  NMR of **6** in  $\text{CDCl}_3$  (400 MHz)

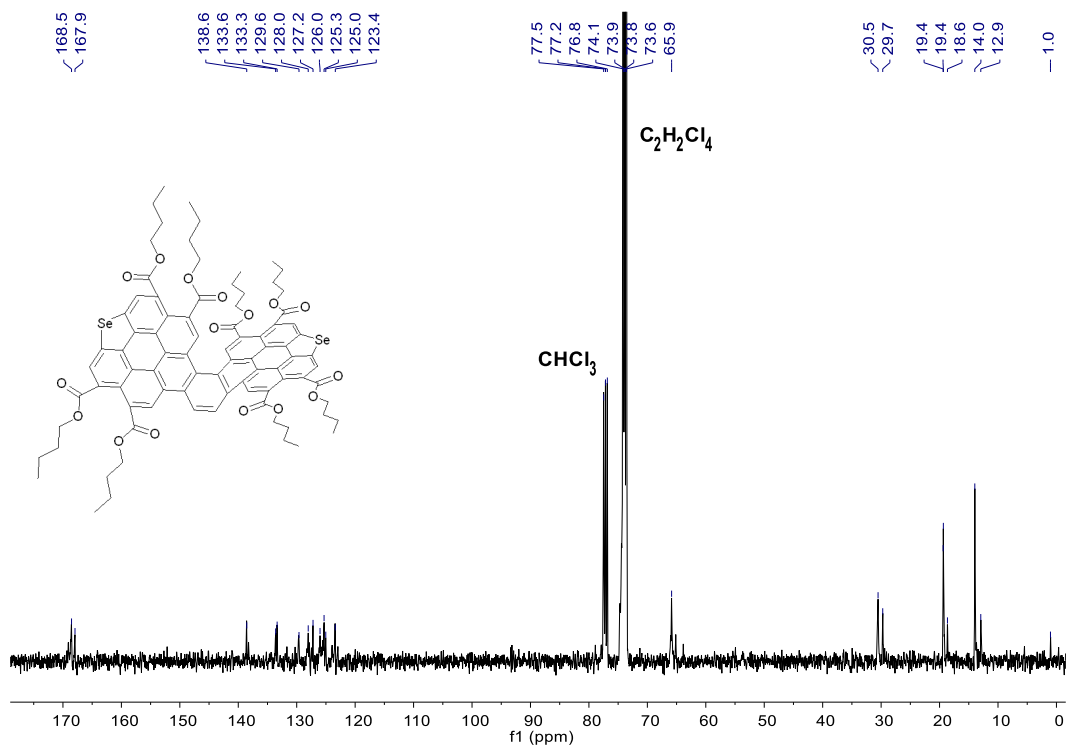

**S3.9.**  $^1\text{H}$  NMR of **TBDPDI-Se-C<sub>11</sub>** in  $\text{CDCl}_3$  (400 MHz)

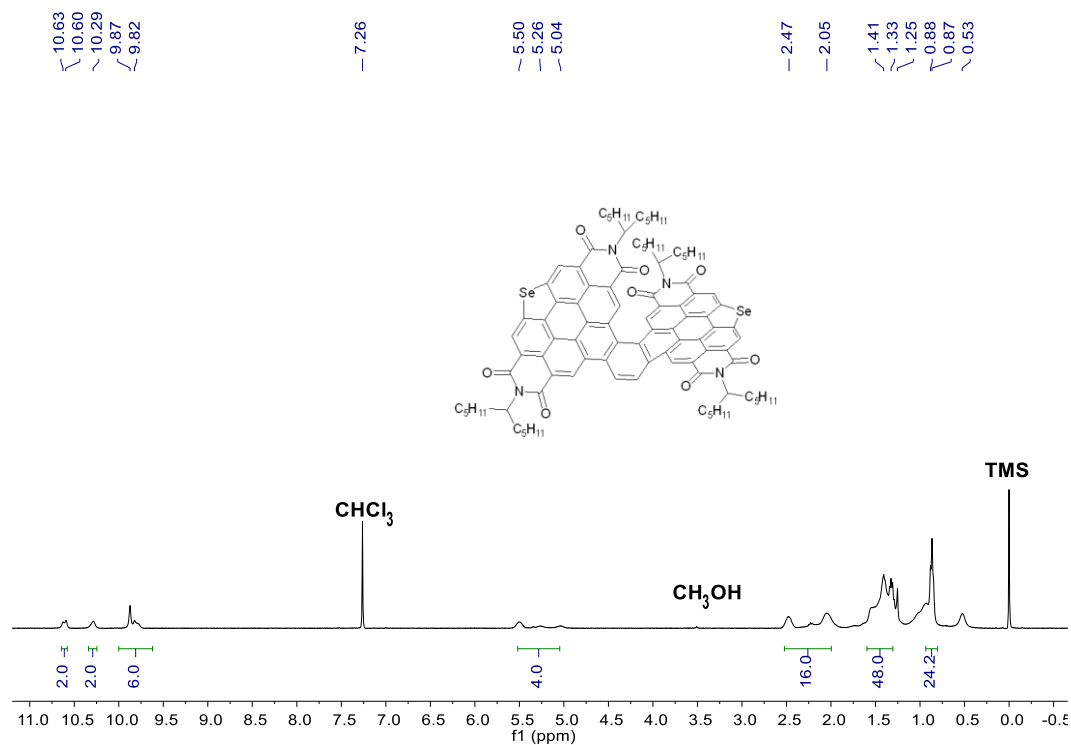

**S3.10.**  $^{13}\text{C}$  NMR of **TBDPDI-Se-C<sub>11</sub>** in  $\text{CDCl}_3$  (100 MHz)

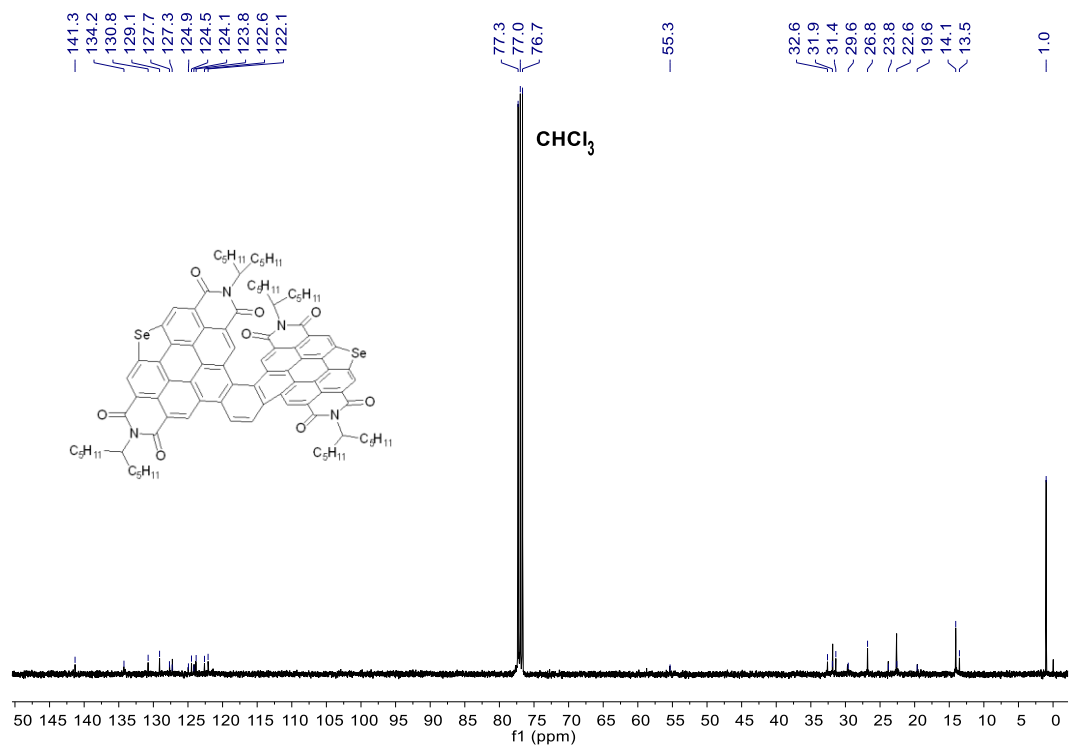

**S3.11.**  $^1\text{H}$  NMR of **TBDPDI-Se-C<sub>23</sub>** in  $\text{CDCl}_3$  (400 MHz)

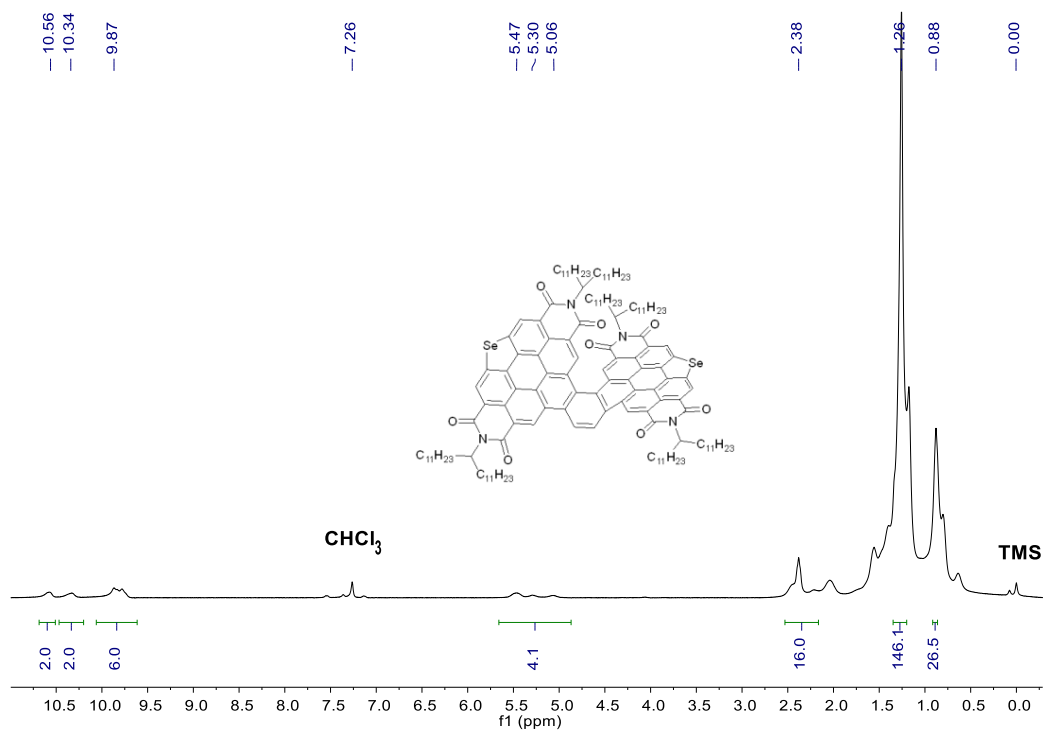

**S3.12.**  $^{13}\text{C}$  NMR of **TBDPDI-Se-C<sub>23</sub>** in  $\text{CDCl}_3$  (100 MHz)

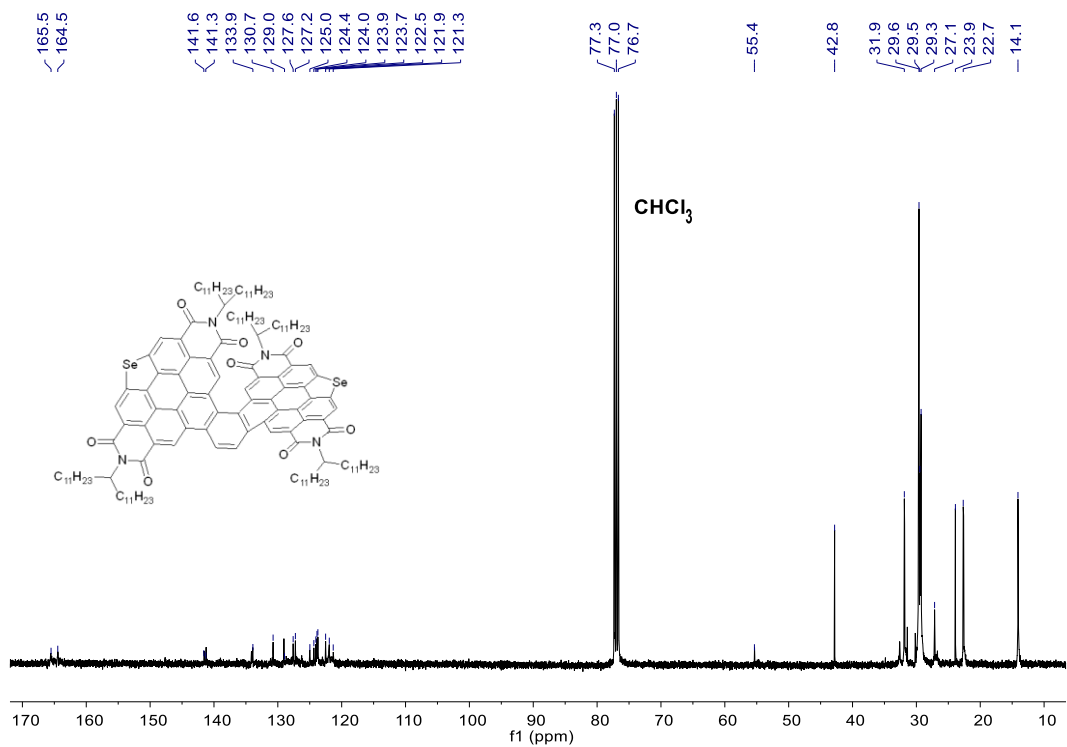

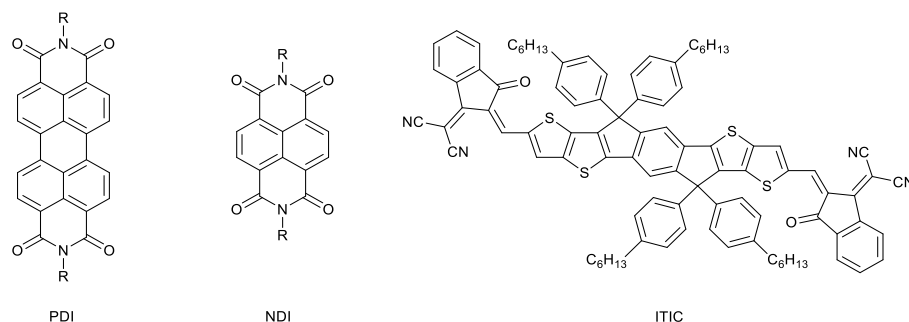

**Fig. S1.** Structure of PDI, NDI and ITIC

**S4. TGA curves of TBDPDI-Se-C<sub>11</sub> and TBDPDI-Se-C<sub>23</sub>.**

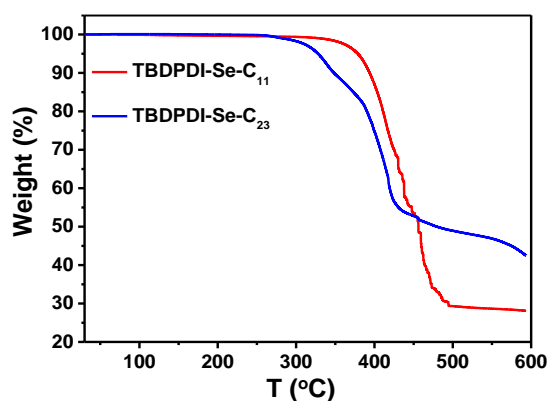

**Fig. S2.** TGA of TBDPDI-Se-C<sub>11</sub> and TBDPDI-Se-C<sub>23</sub>

**S5. DSC curves of TBDPDI-Se-C<sub>11</sub> and TBDPDI-Se-C<sub>23</sub>.**

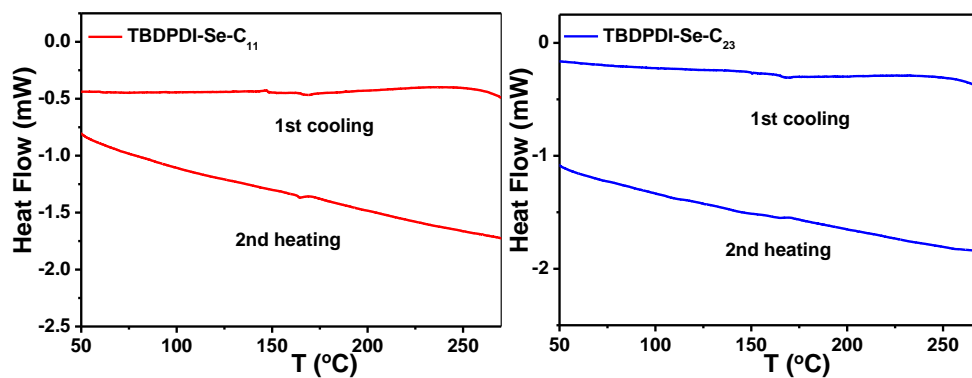

**Fig. S3.** DSC of TBDPDI-Se-C<sub>11</sub> and TBDPDI-Se-C<sub>23</sub>

**S6. UV-visible absorption.**

The UV-vis absorption was recorded on a Perkin Elmer Lambda 750 spectrophotometer. The solution absorption was measured in  $10^{-5}$  mol L<sup>-1</sup> in chloroform. The molar extinction coefficient ( $\epsilon$ ) was obtained from the Beer-Lambert's equation:

$$I = I_0 \times 10^{-\epsilon c l}$$

where,  $I$  and  $I_0$  are the incident and transmitted light intensity, respectively,  $l$  is the path length, and  $c$  is the analyte concentration. To measure thin film absorption, acceptor solution ( $15 \text{ mg}\cdot\text{mL}^{-1}$ ) in chlorobenzene was spin-coated onto quartz substrates at 800 rpm for 1 min.

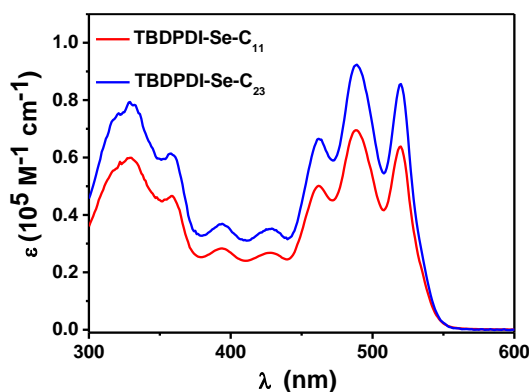

**Fig. S4.** UV-visible absorption spectra of TBDPDI-Se-C<sub>11</sub> and TBDPDI-Se-C<sub>23</sub> in solution

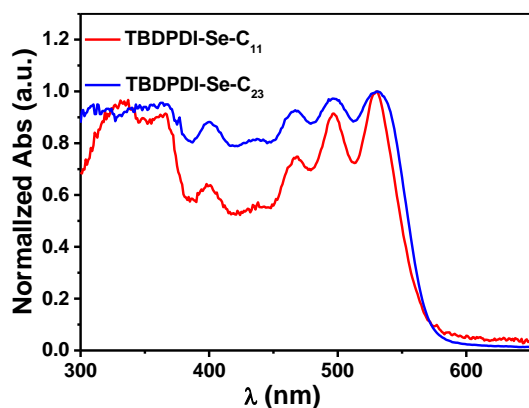

**Fig. S5.** Normalized UV-visible absorption spectra of TBDPDI-Se-C<sub>11</sub> and TBDPDI-Se-C<sub>23</sub> in film

## S7. DFT calculations

Density functional theory (DFT) calculation was performed with basic set of B3LYP/6-311G (d, p). The long-branched alkyl chain was replaced by methyl to simplify the calculation, because they have little effect on the electron density of conjugated cores. The calculated LUMO energy levels, HOMO energy levels, and the electronic cloud distribution are as following.

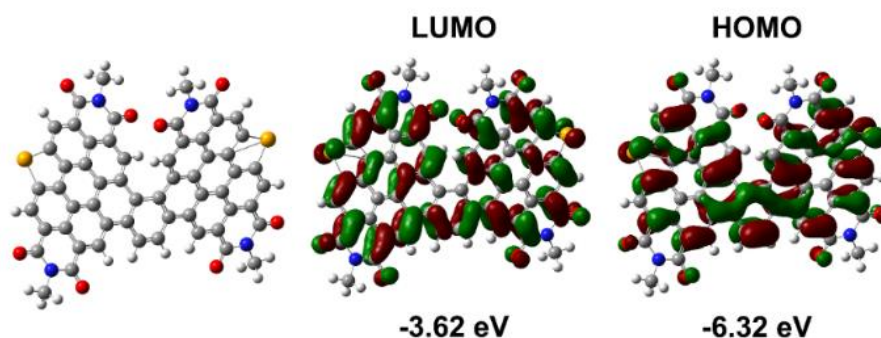

**Fig. S6.** Simulated molecular geometries and energy levels of TBDPDI-Se

## S8. Cyclic voltammetry.

Cyclic voltammetry measurements were performed by using an electrochemical work station with a three-electrode system, with a Ag/Ag<sup>+</sup> reference electrode in saturated KCl, a platinum mesh counter electrode, and a platinum wire working electrode. Organic semiconductors were drop-cast onto the electrode from CHCl<sub>3</sub> solution to form thin films. 0.1 mol L<sup>-1</sup> Bu<sub>4</sub>N<sup>+</sup>PF<sub>6</sub><sup>-</sup> in acetonitrile was used as the supporting electrolyte. A ferrocene/ferrocenium (Fc/Fc<sup>+</sup>) was used as the internal standard. LUMO energy levels were calculated based on the assumption that the energy level of Fc/Fc<sup>+</sup> is -4.8 eV vs vacuum.

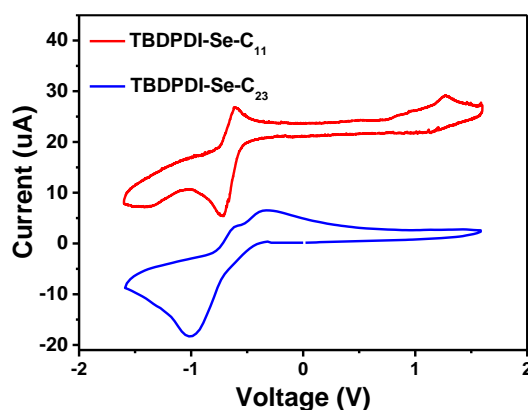

Fig. S7. CV of TBPDI-Se-C<sub>11</sub> and TBPDI-Se-C<sub>23</sub>

## S9. Optimization of the fabricating conditions of solar cells

Organic photovoltaic (OPV) devices were fabricated with an inverted structure of ITO/ZnO/active layer/MoO<sub>3</sub>/Ag. The conductive ITO substrates were sequentially cleaned with ultrasonication in detergent, water, acetone, and isopropanol. After drying the ITO substrates and treating the surface with UV ozone for 20 min. The ZnO precursor solution was prepared by dissolving 0.5 g of zinc acetate dihydrate (Zn (CH<sub>3</sub>COO)<sub>2</sub>·2H<sub>2</sub>O, 99.9%) in 5 mL 2-methoxyethanol (CH<sub>3</sub>OCH<sub>2</sub>CH<sub>2</sub>OH, 99.8%) and 138  $\mu$ L ethanolamine (NH<sub>2</sub>CH<sub>2</sub>CH<sub>2</sub>OH, 99.8%). The ZnO precursor solution was spun-coated at 4000 r.p.m. for 1 min onto the ITO surface. After being baked at 200 °C for 60 min in air, the substrates were transferred into a nitrogen-filled glove box. The optimized solution of active layers (1.5:1 weight ratio, 15 mg/mL in total weight concentration) in chlorobenzene were spun-coated at 1500 rpm resulting in the optimized active layers thickness is about 100 nm determined by AFM. MoO<sub>3</sub> (7 nm) and Ag (90 nm) were deposited by thermal evaporation under a vacuum chamber to complete the device fabrication. The effective area of one cell was 0.04 cm<sup>2</sup>. The current-voltage (*J-V*) characteristics were measured by a Keithley 2400 Source Meter under simulated solar light (100 mW cm<sup>2</sup>, AM 1.5 G, Abet Solar Simulator Sun 2000). The incident photon-to-electron conversion efficiency (IPCE) spectra were detected on an IPCE measuring system (Oriel Cornerstone monochromator equipped with Oriel 70613NS QTH lamp). All the measurement was performed at room temperature under nitrogen atmosphere.

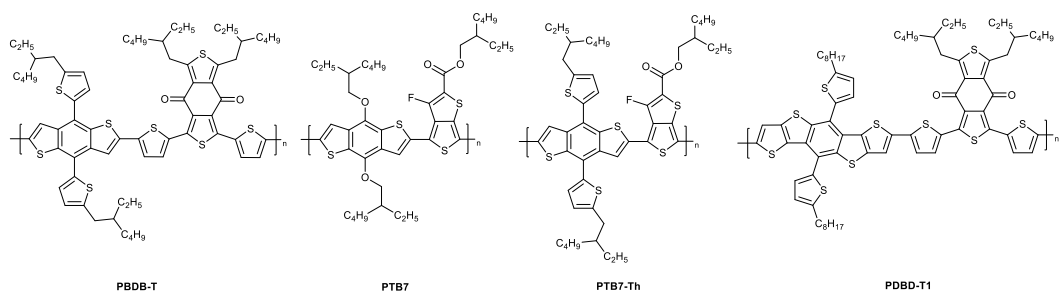

**Fig. S8.** Structures of PBDB-T, PTB7, PTB7-Th, and PDBD-T1.

**Table S1.** Photovoltaic properties of the OSCs based on TBDPDI-Se-C<sub>11</sub> with different donor (D: A = 6 mg/mL: 6 mg/mL).

| Materials                          | $V_{oc}$<br>[V] | $J_{sc}$<br>[mA cm <sup>-2</sup> ] | FF<br>[%] | PCE<br>[%] |
|------------------------------------|-----------------|------------------------------------|-----------|------------|
| PBDB-T: TBDPDI-Se-C <sub>11</sub>  | 1.00            | 9.40                               | 57.00     | 5.34       |
| PTB7: TBDPDI-Se-C <sub>11</sub>    | 0.90            | 9.39                               | 40.01     | 3.37       |
| PTB7-Th: TBDPDI-Se-C <sub>11</sub> | 0.92            | 9.41                               | 38.72     | 3.36       |
| PDBT-T1: TBDPDI-Se-C <sub>11</sub> | 0.81            | 9.16                               | 48.57     | 3.60       |

All devices were measured under the illumination of AM 1.5G, 100 mW cm<sup>-2</sup>

**Table S2.** Photovoltaic properties of the OSCs based on TBDPDI-Se-C<sub>11</sub> with different D/A ratios.

| D/A<br>[w/w] | $V_{oc}$<br>[V] | $J_{sc}$<br>[mA cm <sup>-2</sup> ] | FF<br>[%] | PCE<br>[%] |
|--------------|-----------------|------------------------------------|-----------|------------|
| 15:10        | 0.99            | 10.29                              | 50.75     | 5.15       |
| 12:6         | 1.00            | 11.67                              | 54.16     | 6.30       |
| 9:6          | 1.01            | 10.91                              | 58.09     | 6.37       |
| 6:6          | 1.00            | 9.40                               | 57.00     | 5.34       |
| 6:4          | 0.98            | 9.28                               | 53.83     | 4.91       |

All devices were measured under the illumination of AM 1.5G, 100 mW cm<sup>-2</sup>

**Table S3.** Photovoltaic properties of the OSCs based on PBDB-T:TBDPDI-Se-C<sub>11</sub> (D: A=9:6) with different additives treatment.

| Additives          | $V_{oc}$<br>[V] | $J_{sc}$<br>[mA cm <sup>-2</sup> ] | FF<br>[%] | PCE<br>[%] |
|--------------------|-----------------|------------------------------------|-----------|------------|
| w/o                | 1.01            | 10.91                              | 58.09     | 6.37       |
| 1%CN               | 1.00            | 7.99                               | 53.96     | 4.30       |
| 1%DIO              | 0.98            | 4.55                               | 58.81     | 2.61       |
| 1%NMP <sup>a</sup> | /               | /                                  | /         | /          |
| 1%DPE              | 1.00            | 9.74                               | 58.88     | 5.72       |

<sup>a</sup> The PCE can not be measured by 1% NMP treatment.

All devices were measured under the illumination of AM 1.5G, 100 mW cm<sup>-2</sup>

**Table S4.** Photovoltaic properties of the OSCs based on PBDB-T: TBPDI-Se-C<sub>11</sub> (D:A=9: 6) with different thermal annealing temperature.

| TA   | $V_{oc}$ | $J_{sc}$               | FF    | PCE  |
|------|----------|------------------------|-------|------|
| [°C] | [V]      | [mA cm <sup>-2</sup> ] | [%]   | [%]  |
| w/o  | 1.01     | 10.91                  | 58.09 | 6.37 |
| 100  | 1.01     | 11.34                  | 64.41 | 7.41 |
| 150  | 0.99     | 11.70                  | 59.93 | 6.95 |
| 180  | 0.98     | 11.08                  | 57.85 | 6.29 |

All devices were measured under the illumination of AM 1.5G, 100 mW cm<sup>-2</sup>

### S10. *J-V* Curves for carrier mobility

Hole and electron mobilities were measured using the space charge limited current (SCLC) method, with hole-only device of ITO/poly(3,4-ethylenedioxythiophene): polystyrene sulfonate (PEDOT:PSS)/active layer/MoO<sub>3</sub>/Ag and electron-only device ITO/ZnO/active layer/Ca/Al by taking current-voltage curve in the range of -5.0 V~5.0 V. The SCLC mobilities were calculated by MOTT-Gurney equation, which is described by:

$$J = 9\varepsilon_0\varepsilon_r\mu V^2/8L^3$$

Where  $J$  is the current density,  $L$  is the film thickness of active layer,  $\varepsilon_0$  is the permittivity of free space ( $8.85 \times 10^{-12}$  F m<sup>-1</sup>),  $\varepsilon_r$  is the relative dielectric constant of transport medium,  $\mu$  is the internal voltage in the device.  $V = V_{appl} - V_r - V_{br}$ , where  $V_{appl}$  is the applied voltage to the device,  $V_r$  is the voltage drop due to contact resistance and series resistance across the electrodes, and  $V_{br}$  is the built-in voltage due to the relative work function difference of the two electrodes.<sup>2</sup>

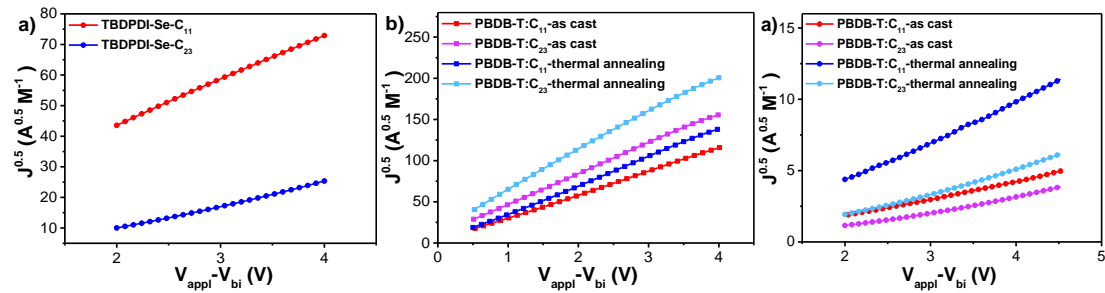

**Fig. S9.** (a) Current density–voltage and SCLC fitting curves of TBPDI-Se-C<sub>11</sub> and TBPDI-Se-C<sub>23</sub> electron only devices, PBDB-T:TBPDI-Se-C<sub>11</sub> and PBDB-T:TBPDI-Se-C<sub>23</sub> blend films (b) hole only devices and (c) electron only devices.

**Table S5.** Electron and hole mobility of acceptor films and blend films.

| Materials                                     | $\mu_h$<br>$\text{cm}^2 \text{V}^{-1} \text{s}^{-1}$ | $\mu_e$<br>$\text{cm}^2 \text{V}^{-1} \text{s}^{-1}$ | $\mu_h/\mu_e$<br>$\text{cm}^2 \text{V}^{-1} \text{s}^{-1}$ |
|-----------------------------------------------|------------------------------------------------------|------------------------------------------------------|------------------------------------------------------------|
| TBDPDI-Se-C <sub>11</sub>                     | /                                                    | $4.72 \times 10^{-4}$                                | /                                                          |
| PBDB-T:TBDPDI-Se-C <sub>11</sub>              | $2.73 \times 10^{-4}$                                | $5.24 \times 10^{-6}$                                | 52.10                                                      |
| PBDB-T:TBDPDI-Se-C <sub>11</sub> <sup>a</sup> | $3.89 \times 10^{-4}$                                | $2.60 \times 10^{-5}$                                | 11.12                                                      |
| TBDPDI-Se-C <sub>23</sub>                     | /                                                    | $1.36 \times 10^{-4}$                                | /                                                          |
| PBDB-T:TBDPDI-Se-C <sub>23</sub>              | $4.67 \times 10^{-4}$                                | $4.87 \times 10^{-7}$                                | 958.93                                                     |
| PBDB-T:TBDPDI-Se-C <sub>23</sub> <sup>a</sup> | $8.05 \times 10^{-4}$                                | $1.09 \times 10^{-6}$                                | 738.53                                                     |

<sup>a</sup>Thermal annealing at 100 °C for 10 min.**S11. Charge separation and recombination dynamics**

To investigate the charge generation and dissociation process of these materials, the photo-generated current density ( $J_{\text{ph}} = J_{\text{L}} - J_{\text{D}}$ ,  $J_{\text{L}}$ : current density under illumination;  $J_{\text{D}}$ : current density in the dark) versus the effective voltage ( $V_{\text{eff}} = V_0 - V_{\text{a}}$ ,  $V_0$ : the voltage when the  $J_{\text{ph}}$  is zero;  $V_{\text{a}}$ : applied voltage) of the BHJOSCs were measured (Fig. 4a and 4b).<sup>3</sup> At high  $V_{\text{eff}}$  ( $> 2$  V), all the photogenerated excitons were dissociated into free charge carriers and collected by electrodes, and the saturation photocurrent density ( $J_{\text{sat}}$ ) was only limited by the absorbed incident photons. Therefore, the  $P_{\text{diss}}$ , which is determined by normalizing  $J_{\text{sc}}$  with  $J_{\text{sat}}$  ( $P_{\text{diss}} = J_{\text{sc}}/J_{\text{sat}}$ ) was also calculated to evaluate the exciton dissociation and charge recombination.<sup>4</sup>

The photocurrent ( $J_{\text{ph}}$ ) and  $V_{\text{oc}}$  versus light intensity ( $P_{\text{light}}$ ) were used to quantify the charge recombination dynamics. The correlation between  $J_{\text{sc}}$  and  $P_{\text{light}}$  could be expressed as a power-law equation of  $J_{\text{sc}} \propto P_{\text{light}}^{\alpha}$ .<sup>5</sup> If all free charge carriers are swept out and collected at the electrodes prior to recombination,  $\alpha$  is supposed to be 1, while  $\alpha < 1$ , bimolecular recombination somewhat exists. The slopes of  $V_{\text{oc}}$  versus  $\log(P_{\text{light}})$  helps us to determine the degree of trap-assisted recombination in the devices. A slope at  $kT/q$  implies that bimolecular recombination is the dominating mechanism, where  $k$  is Boltzmann's constant,  $T$  is temperature and  $q$  is elementary charge<sup>6</sup>

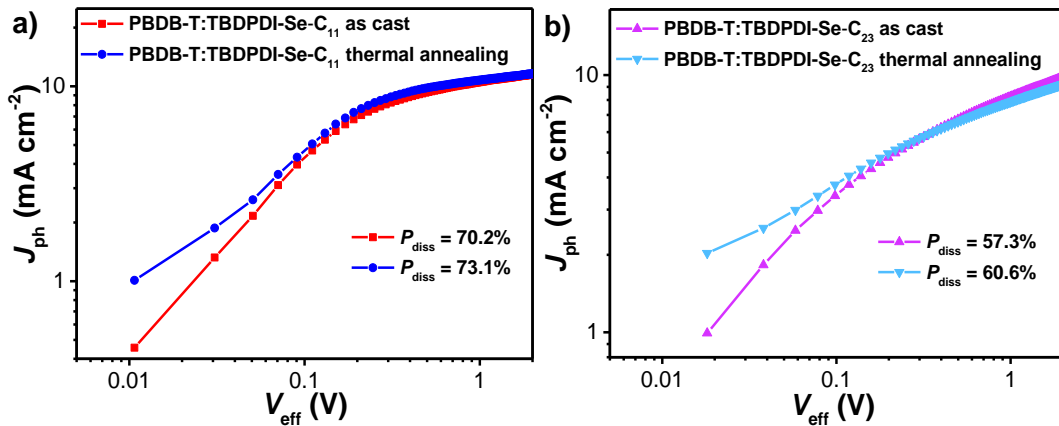

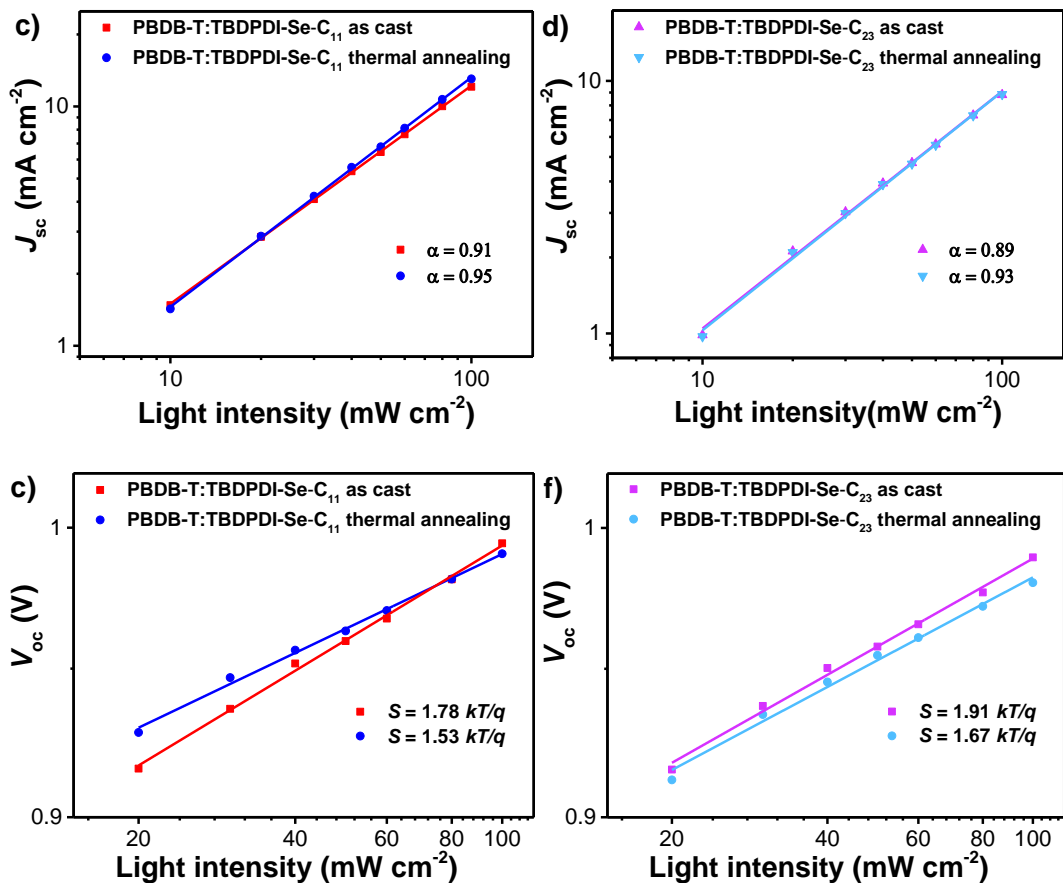

**Fig. S10.** (a, b)  $J_{ph}$  versus  $V_{eff}$  characteristics, (c, d)  $J_{sc}$  versus light intensity, and (e, f)  $V_{oc}$  versus light intensity of TBDPDI-Se-C<sub>11</sub>- and TBDPDI-Se-C<sub>23</sub>-based solar cells with/without thermal annealing.

## S12. AFM images of the blend films

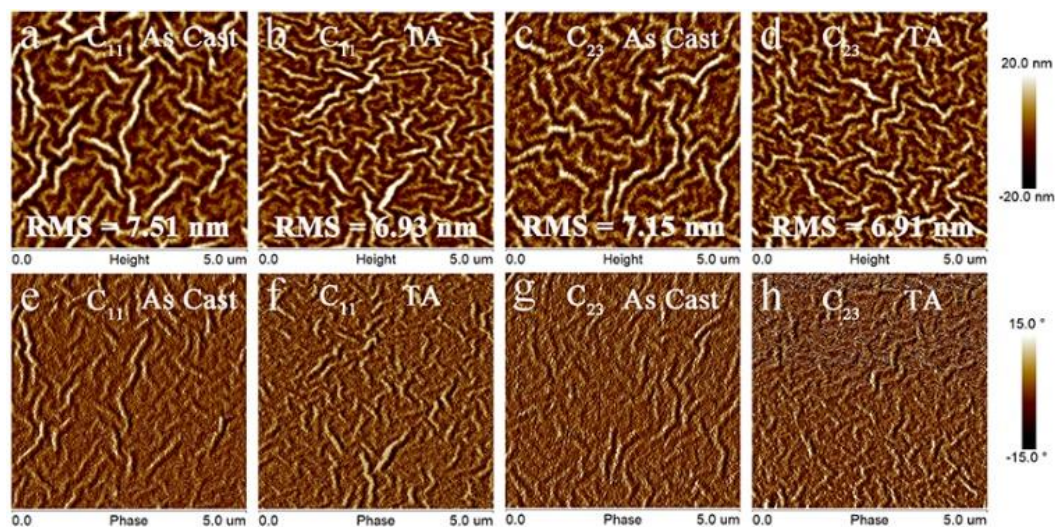

**Fig. S11.** (a-d) AFM height, and (e-h) phase images (scale bar: 5  $\mu\text{m}$ ) of blend films; PBDB-T:TBDPDI-Se-C<sub>11</sub> (a, e) without and (b, f) with thermal annealing, PBDB-T:TBDPDI-Se-C<sub>23</sub> (c, g) without and (d, h) with thermal annealing.

### S13. TEM images of the blend films

Transmission electron microscopy (TEM) images were taken on a JEOL-2100F transmission electron microscope and an internal charge-coupled device (CCD) camera. The specimens for TEM measurement were prepared by spin casting the blend solution on ITO/PEDOT:PSS substrates, the films were floated on a water surface, and transferred to TEM grids.

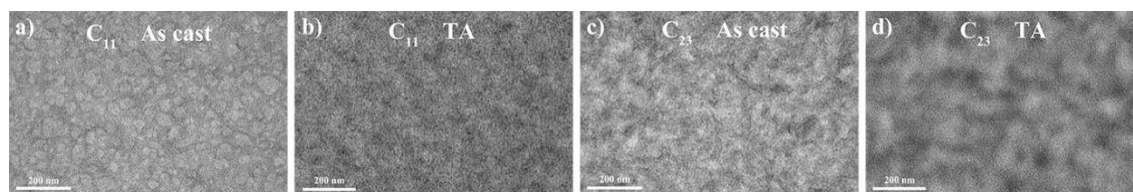

**Fig. S12.** TEM images (scale bar: 200 nm) of blend films; PBDB-T:TBDPDI-Se-C<sub>11</sub> (a) without and (b) with thermal annealing, PBDB-T:TBDPDI-Se-C<sub>23</sub> (c) without and (d) with thermal annealing.

### Reference

- 1 S. Li, L. Ye, W. Zhao, S. Zhang, S. Mukherjee, H. Ade and J. Hou, *Adv Mater*, 2016, **28**, 9423-9429.
- 2 (a) A. Babel and S. A. Jenekhe, *J. Am. Chem. Soc.*, 2003, **125**, 13656-13657; (b) M. M. Alam and S. A. Jenekhe, *Chem. Mater.*, 2004, **16**, 4647-4656; (c) U. Scherf, *J. Mater. Chem.*, 1999, **9**, 1853-1864.
- 3 Q. Wu, D. Zhao, A. M. Schneider, W. Chen and L. Yu, *J. Am. Chem. Soc.*, 2016, **138**, 7248-7251.
- 4 P. Schilinsky, C. Waldauf and C. J. Brabec, *Appl. Phys. Lett.*, 2002, **81**, 3885-3887.
- 5 V. D. Mihailetschi, H. X. Xie, B. de Boer, L. J. A. Koster and P. W. M. Blom, *Adv. Funct. Mater.*, 2006, **16**, 699-708.
- 6 (a) S. R. Cowan, A. Roy and A. J. Heeger, *Physical Review B*, 2010, **82**, 245207; (b) L. Lu, W. Chen, T. Xu and L. Yu, *Nat. Commun.*, 2015, **6**, 7327.
